# Supplementary material for: A critical appraisal of advances in integrated CO2 capture and electrochemical conversion
Source: Royal Society of Chemistry journal article supplement (doi:10.1039/d4sc06642a), 2025-01-01
Supplement: d4sc06642a1.pdf [file d4sc06642a1.pdf]

## Supplemental Information

### **A Critical Appraisal of Advances in Integrated CO<sub>2</sub> Capture and Electrochemical Conversion**

***Ahmed Badreldin<sup>1</sup> and Ying Li<sup>1,2\*</sup>***

<sup>1</sup>J. Mike Walker '66 Department of Mechanical Engineering, Texas A&M University, College Station, TX 77843, USA

<sup>2</sup>Artie McFerrin Department of Chemical Engineering, Texas A&M University, College Station, TX 77843, USA

\*Corresponding author; email: [yingli@tamu.edu](mailto:yingli@tamu.edu)

**Table S1.** Technology-product dependent electrochemical CO<sub>2</sub> reduction cell performance from surveyed contemporary literature.

|                                                       | <b>System 1</b>                                          | <b>System 2</b>         | <b>System 3</b>             | <b>System 4</b>          |
|-------------------------------------------------------|----------------------------------------------------------|-------------------------|-----------------------------|--------------------------|
|                                                       | Conventional Sequential Capture, Compression, Conversion | Amine-Mediated eRCC     | (Bi)Carbonate-Mediated eRCC | Direct Conversion (ACC)  |
| <b>CO<sub>2</sub> to CO</b>                           |                                                          |                         |                             |                          |
| Cell Voltage (V)                                      | 3                                                        | 2.5                     | 3                           | 2.3                      |
| FE (%)                                                | 95                                                       | 72                      | 95                          | 96                       |
| Current Density (mA cm <sup>-2</sup> )                | 200                                                      | 50                      | 100                         | 120                      |
| SPCE (%)                                              | 40                                                       | 80                      | 40                          | 60                       |
| Reference                                             | Gang et al. <sup>1</sup>                                 | Lee et al. <sup>2</sup> | Tester                      | Liu et al. <sup>3</sup>  |
| <b>CO<sub>2</sub> to HCOOH</b>                        |                                                          |                         |                             |                          |
| Cell Voltage (V)                                      | 3                                                        | ---                     | 4                           | 2.6                      |
| FE (%)                                                | 96                                                       | ---                     | 62                          | 90                       |
| Current Density (mA cm <sup>-2</sup> )                | 260                                                      | ---                     | 100                         | 80                       |
| SPCE (%)                                              | 40                                                       | ---                     | 40                          | 60                       |
| Reference                                             | Jia et al. <sup>4</sup>                                  | ---                     | Li et al. <sup>5</sup>      | Zhao et al. <sup>6</sup> |
| <b>CO<sub>2</sub> to CH<sub>3</sub>OH</b>             |                                                          |                         |                             |                          |
| Cell Voltage (V)                                      | 3.3                                                      | ---                     | 4                           | 3.5                      |
| FE (%)                                                | 77.6                                                     | ---                     | 50                          | 50                       |
| Current Density (mA cm <sup>-2</sup> )                | 41.5                                                     | ---                     | 100                         | 100                      |
| SPCE (%)                                              | 50                                                       | ---                     | 60                          | 60                       |
| Reference                                             | Yang et al. <sup>7</sup>                                 | ---                     | Tester                      | Tester                   |
| <b>CO<sub>2</sub> to C<sub>2</sub>H<sub>5</sub>OH</b> |                                                          |                         |                             |                          |
| Cell Voltage (V)                                      | 3.5                                                      | ---                     | 4                           | 3.5                      |
| FE (%)                                                | 52                                                       | ---                     | 30                          | 30                       |
| Current Density (mA cm <sup>-2</sup> )                | 200                                                      | ---                     | 100                         | 100                      |
| SPCE (%)                                              | 40                                                       | ---                     | 60                          | 60                       |
| Reference                                             | Gu et al. <sup>8</sup>                                   | ---                     | Tester                      | Tester                   |
| <b>CO<sub>2</sub> to C<sub>2</sub>H<sub>4</sub></b>   |                                                          |                         |                             |                          |
| Cell Voltage (V)                                      | 2.5                                                      | ---                     | 3.82                        | 4.2                      |
| FE (%)                                                | 70                                                       | ---                     | 40                          | 51                       |
| Current Density (mA cm <sup>-2</sup> )                | 200                                                      | ---                     | 300                         | 525                      |
| SPCE (%)                                              | 40                                                       | ---                     | 35                          | 60                       |
| Reference                                             | Choi et al. <sup>9</sup>                                 | ---                     | Xie et al. <sup>10</sup>    | Nam et al. <sup>11</sup> |

**Table S2.** Process assumptions for CO2 Electrolyzer Model .

| Parameter                                                                        | System 1                                                     | System 2            | System 3                    | System 4                |
|----------------------------------------------------------------------------------|--------------------------------------------------------------|---------------------|-----------------------------|-------------------------|
|                                                                                  | Conventional Sequential Capture, Compression, Conversion     | Amine-Mediated eRCC | (Bi)Carbonate-Mediated eRCC | Direct Conversion (ACC) |
| Production Rate (ton day <sup>-1</sup> )                                         | 100                                                          |                     |                             |                         |
| Plant Lifetime (Years)                                                           | 20                                                           |                     |                             |                         |
| Operating Days Per Year (day year <sup>-1</sup> )                                | 350                                                          |                     |                             |                         |
| LCOE (USD kWh <sup>-1</sup> )                                                    | 0.03                                                         |                     |                             |                         |
| Electrolyzer Cost Based on DOE H2A (USD m <sup>-2</sup> ) <sup>12</sup>          | 919.669                                                      |                     |                             |                         |
| Electrolyzer Maintenance Cost wrt Capital (%)                                    | 2.5                                                          |                     |                             |                         |
| Capture Media                                                                    | 30% MEA                                                      | 30% MEA             | 6.0 M KOH                   | Solid GDE               |
| Capture Media Cost (USD ton <sup>-1</sup> ) <sup>13</sup>                        | 2454                                                         | 2454                | 500                         | ---                     |
| Absorption Capacity (mol <sub>CO2</sub> molsolvent <sup>-1</sup> ) <sup>14</sup> | 0.45                                                         |                     |                             | ---                     |
| Capture Efficiency (%)                                                           | 90                                                           |                     |                             |                         |
| Capture Capital Cost (USD kg <sup>-1</sup> )                                     | 0.000049                                                     | ---                 | ---                         | ---                     |
| PSA Reference Cost (USD)                                                         | 1989043                                                      |                     |                             |                         |
| PSA Scaling Factor                                                               | 0.7                                                          |                     |                             |                         |
| PSA Reference Capacity (m <sup>3</sup> hr <sup>-1</sup> )                        | 1000                                                         |                     |                             |                         |
| PSA Electricity Operating Cost (kWh m <sup>-3</sup> )                            | 0.25                                                         |                     |                             |                         |
| Compressor Reference Cost (0.82 scaling factor)                                  | 5840                                                         |                     |                             |                         |
| Distillation Reference Capacity (kg h <sup>-1</sup> )                            | 77469                                                        |                     |                             |                         |
| Distillation Reference Cost (USD)                                                | 15077002                                                     |                     |                             |                         |
| Distillation Reference Operating Cost (USD day <sup>-1</sup> )                   | 69455                                                        |                     |                             |                         |
| Carbonate Formation (%)                                                          | 30                                                           | ---                 | ---                         | ---                     |
| Labor Cost wrt to Total CAPEX (%)                                                | 5                                                            |                     |                             |                         |
| Electrolyzer Replacement Cost                                                    | ** 15% of Electrolyzer Capital Cost. Replaced every 5 years. |                     |                             |                         |
| Water Cost (USD gal <sup>-1</sup> )                                              | 0.0054                                                       |                     |                             |                         |

**Table S3.** Financial assumptions for NPV Model.

| Parameter                                        | All Systems |
|--------------------------------------------------|-------------|
| Income Tax (%)                                   | 38.9        |
| Discount Rate (%)                                | 10          |
| Market Price of Hydrogen (USD kg <sup>-1</sup> ) | 1.9         |
| Market Price of Oxygen (USD kg <sup>-1</sup> )   | 0.4         |
| Market Price of CO (USD kg <sup>-1</sup> )       | 0.6         |
| Market Price of HCOOH (USD kg <sup>-1</sup> )    | 0.88        |
| Market Price of CH3OH (USD kg <sup>-1</sup> )    | 0.62        |
| Market Price of C2H5OH (USD kg <sup>-1</sup> )   | 0.77        |
| Market Price of C2H4 (USD kg <sup>-1</sup> )     | 1.02        |

**Supplementary Note 1:** Sample Calculation of OPEX and CAPEX Parameters for CO<sub>2</sub> electrochemical reduction through the conventional System 1 towards the 2 electron-transfer HCOOH production. The PFD shown in Figure 1a is relevant to this exercise.

#### Flowrates of Streams – System 1 (HCOOH)

Based on a production rate of 100,000 kg day<sup>-1</sup> of HCOOH at the cathode, the partial current density needed for the 2-electron reaction is:

$$\text{Partial Current Needed: } \frac{100,000 \text{ kg}}{\text{day}} \times \frac{\text{day}}{86,400 \text{ s}} \times \frac{1000 \text{ g}}{\text{kg}} \times \frac{\text{mol}}{46.03 \text{ g}} \times 2e^- \times \frac{96,485 \text{ C}}{\text{mol}} = 4,852,160 \text{ A}$$

The total current density can be obtained by factoring for the 96% HCOOH FE noted in Table S1 for HCOOH under the governance of System 1:

$$\text{Total Current Needed: } \frac{4,852,160 \text{ A}}{0.96} = 5,054,333 \text{ A}$$

The total electrolyzer area (m<sup>2</sup>) needed can then be obtained by dividing the total current by the cell-specific current density noted in Table S1:

$$\text{Electrolyzer Area Needed: } \frac{5,054,333 \text{ A}}{\frac{0.260 \text{ A}}{\text{cm}^2}} \times \frac{\text{m}^2}{10^4 \text{ cm}^2} = 1,944 \text{ m}^2$$

Power requirement for the aforementioned electrolyzer is obtained by Power = Voltage x Current:

$$\text{Required Power: } 3 \text{ V} \times 5,054,333 \text{ A} \times \frac{\text{W}}{10^6 \text{ MW}} = 15.16 \text{ MW}$$

The needed flowrate of CO<sub>2</sub> for its conversion to HCOOH is:

$$\text{CO}_2 \text{ Flowrate Needed for Reaction: } \left[ \frac{4,852,160 \text{ A} \times \frac{86,400 \text{ s}}{\text{day}} \times \frac{0.044 \text{ kg CO}_2}{\text{mol}}}{\frac{2e^-}{\text{mol CO}_2} \times \frac{96,485 \text{ C}}{\text{mol}}} \right] = 95,590 \frac{\text{kg}}{\text{day}}$$

Due to the lost SPCE for HCOOH production under System 1 being 40%, the actual CO<sub>2</sub> mass flowrate that needs to be fed to the cathode is:

$$\text{CO}_2 \text{ Flowrate Needed for Cell: } \left[ \frac{95,590 \frac{\text{kg}}{\text{day}}}{0.4} \right] = 238,975 \frac{\text{kg}}{\text{day}}$$

The outlet unreacted CO<sub>2</sub> is then needed in volumetric flowrate units for downstream sizing of separation equipment (i.e., PSA). Unreacted CO<sub>2</sub> is due to non-idea SPCE at the cathode side:

$$\text{CO}_2 \text{ Volumetric Flowrate at Outlet of Cathode: } \left[ \frac{238,975 \frac{\text{kg}}{\text{day}} \times (1 - 0.4)}{\frac{1.98 \text{ kg CO}_2}{\text{m}^3} \times \frac{24 \text{ hr}}{\text{day}}} \right] = 3,017 \frac{\text{m}^3}{\text{hr}}$$

At the cathode side, the produced HCOOH will be modeled to be in liquid phase. Again, to obtain the volumetric flowrate of HCOOH produced (for downstream sizing of the distillation unit), the following can be used assuming a density of 1,220 kg m<sup>-3</sup> for HCOOH. It is worth noting that for all liquid products, the process is modeled and sized under the assumption of a 30 wt.% content of the target product in a water balance.

$$\text{HCOOH Flowrate out of Cathode: } \left[ \frac{4,852,160 \text{ A}}{2e^- \times \frac{96,485 \text{ C}}{\text{mol}}} \right] \times \left[ \frac{0.04603 \text{ kg}}{\text{mol}} \right] \times \frac{3,600 \text{ s}}{\text{hr}} = 3.415 \frac{\text{m}^3}{\text{hr}}$$

For all modeled technology-product couples, we assume that H<sub>2</sub> is the sole cathodic byproduct at FE < 100 % for the target product. In this case, since the FE for HCOOH is 96%, a corresponding FE of 4% is for H<sub>2</sub>. To size downstream gas separation units, the total gas flowrate from both the cathode (and anode) needs to be considered. A density of 0.0899 kg m<sup>-3</sup> is used for H<sub>2</sub> gas under process conditions.

$$\text{H}_2 \text{ Flowrate out of Cathode: } \left[ \frac{5,054,333 \text{ A} \times (1 - 0.96)}{2e^- \times \frac{96,485 \text{ C}}{\text{mol}}} \right] \times \left[ \frac{0.002 \text{ kg}}{\text{mol}} \right] \times \frac{3,600 \text{ s}}{\text{hr}} = 83.909 \frac{\text{m}^3}{\text{hr}}$$

The total gas flowrate out of the cathode comprising of unreacted CO<sub>2</sub> and evolved H<sub>2</sub> is therefore simply the addition of their volumetric flowrates (83.909 + 3,017) m<sup>3</sup> hr<sup>-1</sup> = 3,101.3 m<sup>3</sup> hr<sup>-1</sup>.

The water flowrate needed for the 2-electron transfer cathodic HER is:

$$\text{Needed H}_2\text{O for H}_2: \left[ \frac{5,054,333 \text{ A} \times (1 - 0.96)}{2e^- \times \frac{96,485 \text{ C}}{\text{mol}}} \right] \times \frac{0.018 \text{ kg}}{\text{mol}} \times 0.2642 \frac{\text{gal}}{\text{kg}} \times \frac{86,400 \text{ s}}{\text{day}} = 421.51 \frac{\text{gal}}{\text{day}}$$

The water flowrate needed for dilution of the produced liquid product is simply based on achieving 30 wt.% of the product as it exits the electrolyzer. In doing so, this allows a higher concentration of HCOOH to reach the distillation, making separation more facile:

$$\text{Needed H}_2\text{O for HCOOH mix: } 3.415 \frac{\text{m}^3}{\text{hr}} \times \frac{0.7}{0.3} \times 264.2 \frac{\text{gal}}{\text{m}^3} = 2,105.42 \frac{\text{gal}}{\text{day}}$$

At the anode side, two primary things occur under System 1 – irrespective of the target cathodic product. The carbonate which formed in-situ from CO<sub>2</sub> acid-base chemistry with the catholyte is allowed to pass through the AEM (anion exchange membrane) from the cathode to the anode side. At the anode, carbonate oxidizes back to CO<sub>2</sub>. Simultaneously, water oxidation at the anode is modeled, which produces O<sub>2</sub> through the conventional 4-electron transfer anodic process (oxygen evolution reaction). Therefore, at the anode for System 1, both CO<sub>2</sub> and O<sub>2</sub> are effluent gases that need to be separated. CO<sub>2</sub> is recycled to the cathode and O<sub>2</sub> can be sold if purified to market standard. The density of O<sub>2</sub> is taken as 1.429 kg m<sup>-3</sup>.

$$\text{CO}_2 \text{ Volumetric Flowrate at Outlet of Anode: } \left[ \frac{238,975 \frac{\text{kg}}{\text{day}} \times (1 - 0.3)}{\frac{1.98 \text{ kg CO}_2}{\text{m}^3} \times \frac{24 \text{ hr}}{\text{day}}} \right] = 1,508.68 \frac{\text{m}^3}{\text{hr}}$$

$$\text{O}_2 \text{ Volumetric Flowrate at Anode: } \left[ \frac{4,852,160 \text{ A}}{4e^- \times \frac{96,485 \text{ C}}{\text{mol}}} \right] \times \left[ \frac{0.032 \text{ kg}}{\text{mol}} \right] \times \frac{3,600 \text{ s}}{\text{hr}} = 1,056 \frac{\text{m}^3}{\text{hr}}$$

The total effluent anodic gas flowrate is therefore (1,056 + 1,508.68) m<sup>3</sup> hr<sup>-1</sup> ~ 2,565 m<sup>3</sup> hr<sup>-1</sup>.

The water needed at the anode for the anodic OER is:

$$\text{Needed H}_2\text{O for O}_2: \left[ \frac{5,054,333 \text{ A}}{4e^- \times \frac{96,485 \text{ C}}{\text{mol}}} \right] \times \frac{0.018 \text{ kg}}{\text{mol}} \times 0.2642 \frac{\text{gal}}{\text{kg}} \times \frac{86,400 \text{ s}}{\text{day}} = 5,268.9 \frac{\text{gal}}{\text{day}}$$

This is mentioned here for reference only since this exercise is on System 1, but for liquid-based eRCC Systems (i.e., System 3 for HCOOH), if cell parameters from Table S1 are used, an additional accounting of reactive capture electrolyte would need to be done. For reference, it would come to be equal to 2,158,918 kg day<sup>-1</sup>. Not only is it by far the largest liquid-based flowrate of the system (and therefore the raw cost of the electrolyte is high), but more importantly CAPEX and OPEX sizing equations for distillation units are based on non-linearly sized from flowrate. This reflects the huge costs associated with liquid-mediated eRCC Systems 2 and 3 for target products which are liquids (i.e., HCOOH, CH<sub>3</sub>OH, C<sub>2</sub>H<sub>5</sub>OH). This is discussed more in the paper.

### CAPEX Calculations – System 1 (HCOOH)

CAPEX Calculations (as per Figure 1a for System 1) will involve the electrolyzer cost, separation units for gas (PSA) and liquid (distillation), the capital cost for the compressors which take the purified CO<sub>2</sub> from the upstream strippers to the electrolyzer, the amine-based absorption and stripping towers, and the Balance of Plant (BoP). The electrolyzer sizing is based on the DOE H<sub>2</sub>A analysis for central grid electrolysis which corresponds to a stack cost of 250.25 USD kW<sup>-1</sup>. Therein, the electrolyzer used in the H<sub>2</sub>A model requires 1.75 V to sustain 175 mA cm<sup>-2</sup> of current density and the installation factor is 1.2. Therefore, to get the normalized cost per unit area for the electrolyzer the following calculation is performed:

$$\text{Reference Electrolyzer Cost} \frac{1.2 \times 0.175 \text{ A}}{\text{cm}^2} \times \frac{250.25 \text{ USD}}{\text{kW}} \times \frac{10^4 \text{ cm}^2 \times \text{kW}}{\text{m}^2 \times 10^3 \text{ W}} \times 1.75 \text{ V} = 919.67 \frac{\text{USD}}{\text{m}^2}$$

Knowing that 1,944 m<sup>2</sup> of electrolyzer area is needed, the Electrolyzer CAPEX is therefore:

$$\text{Electrolyzer Cost: } 919.67 \frac{\text{USD}}{\text{m}^2} \times 1,944 \text{ m}^2 = 1,787,812 \text{ USD}$$

Following the H2A Model, the BoP for the electrolyzer is 35% of the total cost, with the balance being for the stack. Therefore, the BoP capital cost is  $1,787,812 \times (0.35/0.65) = 962,668 \text{ USD}$ .

With an upstream levelized capture capital cost of  $0.000049 \text{ USD kg}^{-1}$ , the  $\text{CO}_2$  capture capital cost is simply the needed  $\text{CO}_2$  flowrate for the cell multiplied by the levelized cost:

$$\text{CO}_2 \text{ Capture Cost: } 238,975 \frac{\text{kg}}{\text{day}} \times 0.000049 \frac{\text{USD}}{\text{kg}} \times 350 \frac{\text{days}}{\text{year}} \times 20 \text{ years} = 81,968 \text{ USD}$$

As alluded to, since this is a liquid-target product example, only one PSA will be needed at the cathode to separate the unreacted  $\text{CO}_2$  from the byproduct  $\text{H}_2$ , and one PSA will be needed at the anode gas effluent to separate  $\text{CO}_2$  (from crossed over carbonate) from the  $\text{O}_2$  evolved at the anode. It is worth noting that when the target product is gas (i.e.,  $\text{CO}$ ), two PSAs will be needed at the cathode in series. The first will separate the  $\text{CO}_2$  from the  $\text{H}_2$  and  $\text{CO}$ , and the second will separate the  $\text{CO}$  from  $\text{H}_2$ . Notwithstanding, the CAPEX for the PSAs used in this example are as follows:

$$\text{PSA Capital Cost: } 1,989,043 \text{ USD} \times \left[ \left( \frac{3,101.3 \text{ m}^3}{1000 \text{ m}^3} \frac{\text{hr}}{\text{hr}} \right)^{0.7} + \left( \frac{2,565 \text{ m}^3}{1000 \text{ m}^3} \frac{\text{hr}}{\text{hr}} \right)^{0.7} \right] = 8237970 \text{ USDs}$$

For obtaining the capital cost needed for the compressors, the power needed (assuming 72% compressor efficiency) is obtained assuming the stream is pure  $\text{CO}_2$  at a flowrate equivalent to the inlet  $\text{CO}_2$  flowrate needed for the cell. For simplicity, and assuming the upstream  $\text{CO}_2$  purification step is very close to the electrolyzer such that no significant pressure drops during transfer will be noted, a design discharge pressure of 0.1 barg is used to obtain the needed work. For example, under the  $\text{CO}_2$  flowrate of  $238,975 \text{ kg day}^{-1}$  (equivalent to  $5028.9 \text{ m}^3 \text{ hr}^{-1}$ ) the needed work is 18.7 kW. Using the Douglas relation, the CAPEX for the compressor is:

$$\text{Compressor Capital Cost: } 5,840 \text{ USD} \times (18.7 \text{ kW})^{0.82} = 64,465 \text{ USD}$$

However, for comparison if the target discharge pressure needed was for longer distances and to consider pressure drops along the pipeline – assuming discharge pressure of 2 barg – the work needed to compress the same fluid would be 243.7 kW. This would bring the capital cost of the compressor to 529,218 USD. Notwithstanding, for all System 1 products in this work, a 0.1 barg discharge pressure was assumed.

Since this product is a liquid, we need distillation to purify the product stream. This is calculated by scaling the reference cost of the total liquid flowrate. The division by 0.3 is to account for the fact that the process was modeled with 30 wt.%  $\text{HCOOH}$  and therefore the remaining 70% water needs to be accounted for when sizing the distillation:

$$\text{Distillation Capital Cost: } 1,5077,002 \text{ USD} \times \left( \frac{100,000 \text{ kg} \frac{\text{day}}{\text{day}} \times \frac{\text{day}}{24 \text{ hr}} \times \frac{1}{0.3}}{\frac{77,469 \text{ kg}}{\text{hr}}} \right)^{0.7} = 4,526,814 \text{ USD}$$

Taking this into account, the total CAPEX comes to 15,579,741 USD.

## OPEX Calculations – System 1 (HCOOH)

The electricity cost of the electrolyzer operation is calculated with a LCOE of 0.03 USD kWh<sup>-1</sup> as noted in Table S2.

$$\text{Electrolyzer Operating Cost: } 15.16 \text{ MW} \times \frac{1,000 \text{ kW}}{\text{MW}} \times \frac{0.03 \text{ USD}}{\text{kWh}} \times \frac{24 \text{ hrs}}{\text{day}} = 10917 \frac{\text{USD}}{\text{day}}$$

Maintenance cost of the electrolyzer is based on H2A model, wherein it is assumed to be 2.5% of the electrolyzer capital cost per year:

$$\text{Electrolyzer Maintenance Cost: } 1,787,812 \frac{\text{USD} \times \text{year}}{350 \text{ days}} \times 0.025 = 128 \frac{\text{USD}}{\text{day}}$$

The replacement cost of cell components is taken as 15% of the electrolyzer capital cost levelized per day and replacement is conservatively assumed every 5 years:

$$\text{Labor Cost: } 1,787,812 \frac{\text{USD} \times \text{year}}{350 \text{ days}} \times \frac{0.15}{5 \text{ year}} = 153 \frac{\text{USD}}{\text{day}}$$

The PSA operating cost is based on the scaling the gas flowrates (both anode and cathode since it is a linear relation) with the scaling parameter noted in Table S2 (0.25 kWh m<sup>-3</sup>) as follows:

$$\text{PSAs Operating Cost: } \frac{0.25 \text{ kWh}}{\text{m}^3} \times \left( \frac{2565 \text{ m}^3}{\text{hr}} + \frac{3,101.3 \text{ m}^3}{\text{hr}} \right) \times \frac{0.03 \text{ USD}}{\text{kWh}} \times \frac{24 \text{ hrs}}{\text{day}} = 1020 \frac{\text{USD}}{\text{day}}$$

Based on the known work of Rochelle et al.,<sup>15</sup> the cost information for CO<sub>2</sub> scrubbing from MEA in Table S2 is obtained and modeled with 100% thermal efficiency. To that end, the upstream CO<sub>2</sub> capture energy operating cost is calculated as follows:

$$\text{CO}_2 \text{ Capture Energy Required: } 238,975 \frac{\text{kg}}{\text{day}} \times \frac{3.8 \text{ GJ}}{\text{ton}} \times \frac{\text{ton}}{10^3 \text{ kg}} = 908 \frac{\text{GJ}}{\text{day}}$$

$$\text{CO}_2 \text{ Capture Energy Operating Cost: } 908 \frac{\text{GJ}}{\text{day}} \times \frac{1 \text{ MWh}}{3.6 \text{ GJ}} \times \frac{0.03 \text{ USD}}{\text{kWh}} \times \frac{10^3 \text{ kWh}}{\text{MWh}} = 7,568 \frac{\text{USD}}{\text{day}}$$

Compression operating cost is then calculated based on 0.35 GJ ton<sup>-1</sup> as follows:

$$\text{CO}_2 \text{ Compression Energy Required: } 238,975 \frac{\text{kg}}{\text{day}} \times \frac{0.35 \text{ GJ}}{\text{ton}} \times \frac{\text{ton}}{10^3 \text{ kg}} = 84 \frac{\text{GJ}}{\text{day}}$$

$$\text{CO}_2 \text{ Compression Energy Operating Cost: } 84 \frac{\text{GJ}}{\text{day}} \times \frac{1 \text{ MWh}}{3.6 \text{ GJ}} \times \frac{0.03 \text{ USD}}{\text{kWh}} \times \frac{10^3 \text{ kWh}}{\text{MWh}} = 697 \frac{\text{USD}}{\text{day}}$$

Next, the upstream 30% MEA sorbent capture cost is calculated as:

$$\text{Upstream Sorbent Operating Cost: } 238,975 \frac{\text{kg}}{\text{day}} \times \frac{\text{mol CO}_2}{0.044 \text{ kg}} \times \frac{\text{mol MEA}}{(0.45 \text{ mol CO}_2) \times (0.9)}$$

$$\frac{61.08 \times 10^{-6} \text{ ton MEA}}{\text{mol MEA}} \times \frac{2425 \text{ USD}}{\text{ton MEA}} \times \frac{\text{year}}{20 \text{ year} \times 350 \text{ days}} = 284 \frac{\text{USD}}{\text{day}}$$

The distillation operating cost is then calculated based on the scaling parameters in Table S2:



$$\text{Distillation Operating Cost: } 69,455 \frac{\text{USD}}{\text{day}} \times \left( \frac{\frac{100,000 \text{ kg}}{\text{day}} \times \frac{\text{day}}{24 \text{ hr}} \times \frac{1}{0.3}}{\frac{77,469 \text{ kg}}{\text{hr}}} \right) = 12,452 \frac{\text{USD}}{\text{day}}$$

The water operating cost is calculated based on the cost of needed water flowrate for cathodic and anodic processes:

$$\text{Water Operating Cost: } 0.0054 \frac{\text{USD}}{\text{gal}} \times \left( 5,268.9 \frac{\text{gal}}{\text{day}} + 421.51 \frac{\text{gal}}{\text{day}} + 2,105.42 \frac{\text{gal}}{\text{day}} \right) = 42 \frac{\text{USD}}{\text{day}}$$

The labor cost is taken as 5% of the total CAPEX levelized per day:

$$\text{Labor Cost: } \frac{15,579,741 \text{ USD} \times 0.05}{20 \text{ year} \times 350 \frac{\text{days}}{\text{year}}} = 111 \frac{\text{USD}}{\text{day}}$$

Therefore, the total OPEX is 33,372 USD day<sup>-1</sup>.

**TableS4.** System-dependent OPEX breakdown for 100-ton day<sup>-1</sup> CO production.

|                          | <b>System 1</b> | <b>System 2</b> | <b>System 3</b> | <b>System 4</b> |
|--------------------------|-----------------|-----------------|-----------------|-----------------|
| Electrolyzer Electric    | 36%             | 54%             | 64%             | 52%             |
| Electrolyzer Maintenance | 1%              | 4%              | 2%              | 2%              |
| PSA                      | 6%              | 3%              | 5%              | 7%              |
| Capture Energy           | 24%             | 0%              | 0%              | 0%              |
| Compression              | 2%              | 0%              | 0%              | 0%              |
| Sorbent                  | 1%              | 1%              | 0%              | 0%              |
| Water                    | 0%              | 0%              | 0%              | 0%              |
| Labor                    | 17%             | 3%              | 1%              | 2%              |
| Component Replacement    | 3%              | 5%              | 2%              | 2%              |
| Capital Depreciation     | 7%              | 15%             | 9%              | 12%             |
| Average Income Tax       | 3%              | 16%             | 18%             | 23%             |

**TableS5.** System-dependent OPEX breakdown for 100-ton day<sup>-1</sup> HCOOH production.

|                          | <b>System 1</b> | <b>System 3</b> | <b>System 4</b> |
|--------------------------|-----------------|-----------------|-----------------|
| Electrolyzer Electric    | 30%             | 3%              | 37%             |
| Electrolyzer Maintenance | 0%              | 0%              | 2%              |
| Separations              | 37%             | 96%             | 47%             |
| Capture Energy           | 21%             | 0%              | 0%              |
| Compression              | 2%              | 0%              | 0%              |
| Sorbent                  | 1%              | 0%              | 0%              |
| Water                    | 0%              | 0%              | 0%              |
| Labor                    | 0%              | 0%              | 0%              |
| Component Replacement    | 0%              | 0%              | 2%              |
| Capital Depreciation     | 6%              | 1%              | 9%              |
| Average Income Tax       | 3%              | 0%              | 4%              |

**TableS6.** System-dependent OPEX breakdown for 100-ton day<sup>-1</sup> CH<sub>3</sub>OH production.

|                          | <b>System 1</b> | <b>System 3</b> | <b>System 4</b> |
|--------------------------|-----------------|-----------------|-----------------|
| Electrolyzer Electric    | 53%             | 13%             | 75%             |
| Electrolyzer Maintenance | 4%              | 0%              | 2%              |
| Separations              | 12%             | 84%             | 10%             |
| Capture Energy           | 7%              | 0%              | 0%              |
| Compression              | 1%              | 0%              | 0%              |
| Sorbent                  | 0%              | 0%              | 0%              |
| Water                    | 0%              | 0%              | 0%              |
| Labor                    | 1%              | 0%              | 0%              |
| Component Replacement    | 4%              | 0%              | 2%              |
| Capital Depreciation     | 13%             | 1%              | 7%              |
| Average Income Tax       | 5%              | 1%              | 3%              |

**TableS7.** System-dependent OPEX breakdown for 100-ton day<sup>-1</sup> C<sub>2</sub>H<sub>5</sub>OH production.

|                          | <b>System 1</b> | <b>System 3</b> | <b>System 4</b> |
|--------------------------|-----------------|-----------------|-----------------|
| Electrolyzer Electric    | 73%             | 22%             | 80%             |
| Electrolyzer Maintenance | 1%              | 0%              | 2%              |
| PSA                      | 9%              | 74%             | 5%              |
| Capture Energy           | 8%              | 0%              | 0%              |
| Compression              | 1%              | 0%              | 0%              |
| Sorbent                  | 1%              | 0%              | 0%              |
| Water                    | 0%              | 0%              | 0%              |
| Labor                    | 0%              | 0%              | 0%              |
| Component Replacement    | 1%              | 1%              | 3%              |
| Capital Depreciation     | 5%              | 2%              | 7%              |
| Average Income Tax       | 2%              | 1%              | 3%              |

**TableS8.** System-dependent OPEX breakdown for 100-ton day<sup>-1</sup> C<sub>2</sub>H<sub>4</sub> production.

|                          | System 1 | System 3 | System 4 |
|--------------------------|----------|----------|----------|
| Electrolyzer Electric    | 68%      | 92%      | 95%      |
| Electrolyzer Maintenance | 1%       | 1%       | 0%       |
| PSA                      | 4%       | 1%       | 1%       |
| Capture Energy           | 14%      | 0%       | 0%       |
| Compression              | 1%       | 0%       | 0%       |
| Sorbent                  | 1%       | 0%       | 0%       |
| Water                    | 0%       | 0%       | 0%       |
| Labor                    | 0%       | 0%       | 0%       |
| Component Replacement    | 1%       | 1%       | 0%       |
| Capital Depreciation     | 7%       | 3%       | 2%       |
| Average Income Tax       | 3%       | 1%       | 1%       |

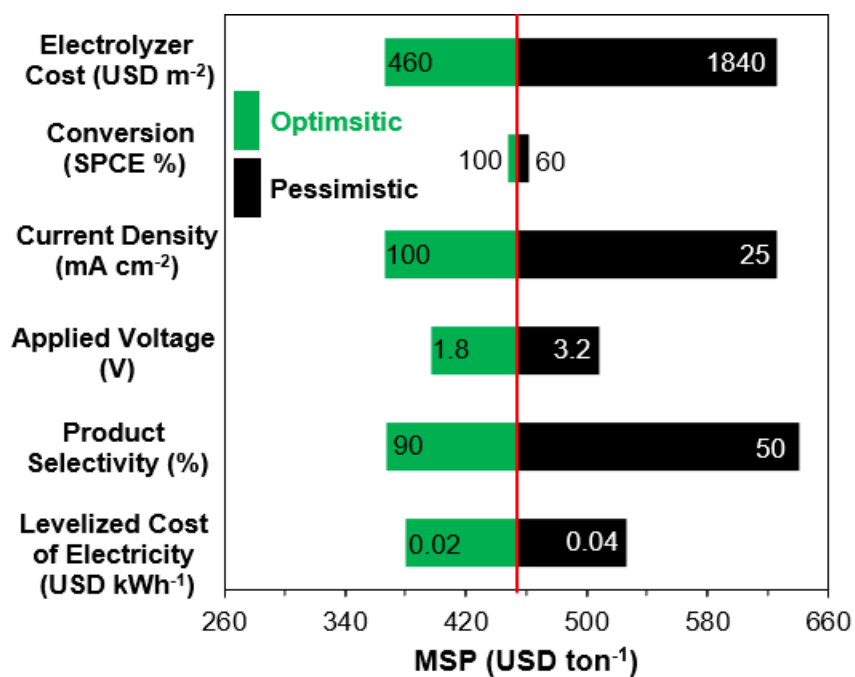

**Figure S1.** Sensitivity analysis of System 2 (amine-mediated eRCC) for CO Production.

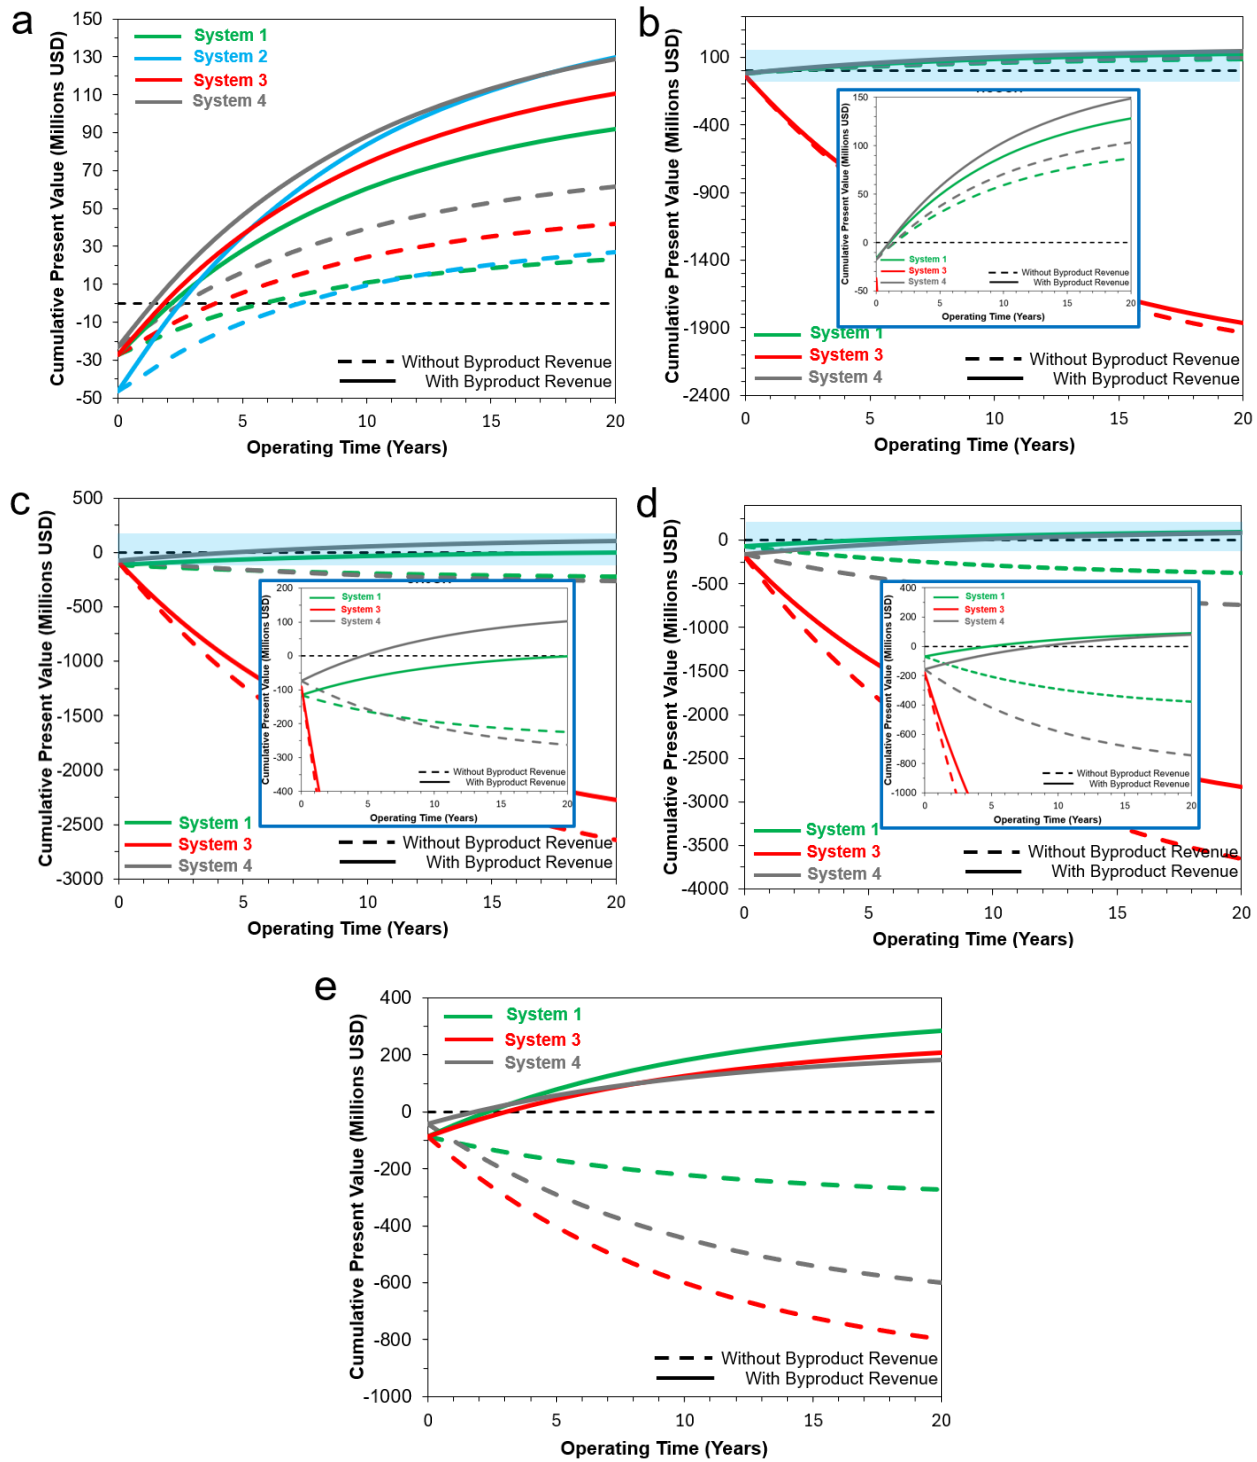

**Figure S2.** (a) Cumulative Present Value (CPV) vs. Years for CO, (b) HCOOH, (c) CH<sub>3</sub>OH, (d) C<sub>2</sub>H<sub>5</sub>OH, and (e) C<sub>2</sub>H<sub>4</sub> based on the different technologies/systems and with and without consideration of accounting for revenue streams of byproducts H<sub>2</sub> and O<sub>2</sub>.

## References

- (1) Gang, Y.; Li, B.; Fang, S.; Pellessier, J.; Fang, L.; Pan, F.; ... & Li, Y. Efficient electrochemical CO<sub>2</sub> reduction to CO by metal and nitrogen co-doped carbon catalysts derived from pharmaceutical wastes adsorbed on commercial carbon nanotubes. *Chemical Engineering Journal* **2023**, *453*, 139712.
- (2) Lee, G.; Li, Y. C.; Kim, J. Y.; Peng, T.; Nam, D. H.; Sedighian Rasouli, A.; ... & Sargent, E. H. Electrochemical upgrade of CO<sub>2</sub> from amine capture solution. *Nature Energy* **2021**, *6* (1), 46-53.
- (3) Liu, Y. Y.; Huang, J. R.; Zhu, H. L.; Liao, P. Q.; & Chen, X. M. Simultaneous Capture of CO<sub>2</sub> Boosting Its Electroreduction in the Micropores of a Metal–organic Framework. *Angewandte Chemie* **2023**, *135* (52), e202311265.
- (4) Jia, B.; Chen, Z.; Li, C.; Li, Z.; Zhou, X.; Wang, T.; ... & Zhang, B. Indium cyanamide for industrial-grade CO<sub>2</sub> electroreduction to formic acid. *Journal of the American Chemical Society* **2023**, *145* (25), 14101-14111.
- (5) Li, T.; Lees, E. W.; Zhang, Z.; & Berlinguette, C. P. Conversion of bicarbonate to formate in an electrochemical flow reactor. *ACS Energy Letters* **2020**, *5* (8), 2624-2630.
- (6) Zhao, Z. H.; Huang, J. R.; Huang, D. S.; Zhu, H. L.; Liao, P. Q.; & Chen, X. M. Efficient Capture and Electroreduction of Dilute CO<sub>2</sub> into Highly Pure and Concentrated Formic Acid Aqueous Solution. *Journal of the American Chemical Society* **2024**, *146* (20), 14349-14356.
- (7) Yang, D.; Zhu, Q.; Chen, C.; Liu, H.; Liu, Z.; Zhao, Z.; ... & Han, B. Selective electroreduction of carbon dioxide to methanol on copper selenide nanocatalysts. *Nature communications* **2019**, *10* (1), 677.
- (8) Gu, Z.; Shen, H.; Chen, Z.; Yang, Y.; Yang, C.; Ji, Y.; ... & Zheng, G. Efficient electrocatalytic CO<sub>2</sub> reduction to C<sub>2</sub>+ alcohols at defect-site-rich Cu surface. *Joule* **2021**, *5* (2), 429-440.
- (9) Choi, C.; Kwon, S.; Cheng, T.; Xu, M.; Tieu, P.; Lee, C.; ... & Huang, Y. Highly active and stable stepped Cu surface for enhanced electrochemical CO<sub>2</sub> reduction to C<sub>2</sub>H<sub>4</sub>. *Nature catalysis* **2020**, *3* (10), 804-812.
- (10) Xie, K.; Miao, R. K.; Ozden, A.; Liu, S.; Chen, Z.; Dinh, C. T.; ... & Sargent, E. H. Bipolar membrane electrolyzers enable high single-pass CO<sub>2</sub> electroreduction to multicarbon products. *Nature communications* **2022**, *13* (1), 3609.
- (11) Nam, D. H.; Shekhah, O.; Ozden, A.; McCallum, C.; Li, F.; Wang, X.; ... & Sargent, E. H. High-Rate and Selective CO<sub>2</sub> Electrolysis to Ethylene via Metal–Organic-Framework-Augmented CO<sub>2</sub> Availability. *Advanced Materials* **2022**, *34* (51), 2207088.
- (12) Jouny, M.; Luc, W.; & Jiao, F. General techno-economic analysis of CO<sub>2</sub> electrolysis systems. *Industrial & Engineering Chemistry Research* **2018**, *57* (6), 2165-2177.
- (13) Davis, J.; & Rochelle, G. Thermal degradation of monoethanolamine at stripper conditions. *Energy Procedia* **2009**, *1* (1), 327-333.
- (14) Chai, S. Y. W.; Ngu, L. H.; & How, B. S. Review of carbon capture absorbents for CO<sub>2</sub> utilization. *Greenhouse Gases: Science and Technology* **2022**, *12* (3), 394-427.
- (15) Rochelle, G. T. Amine scrubbing for CO<sub>2</sub> capture. *Science* **2009**, *325* (5948), 1652-1654.
